# Supplementary material for: Identification of Climate and Genetic Factors That Control Fat Content and Fatty Acid Composition of Theobroma cacao L. Beans
Source: Front Plant Sci. 2019 Oct 14;10:1159. doi: 10.3389/fpls.2019.01159 (PMC6802002; doi:10.3389/fpls.2019.01159)
Supplement: Supplementary Table 4 — Mapping of SAD gene models in the identified FA QTLs. QTL mapping results for the markers near the FAB2/SAD candidate genes with the Matina v2 coordinates. [file Table_4.xlsx]

## Sheet: Sheet1
Gene model	Gene model region	Trait	LG	BP position	map position	-log10(p)	% var. expl
(TcSAD5), Thecc1EG017405	3543727, 3545806	16:0	4	3389146	14.41	19.63	17.93
				3439350	14.41	19.63	17.93
				3210285	13.42	19.5	17.83
				3281224	13.42	19.5	17.83
				3208089	13.31	19.28	17.67
		18:0	4	3389146	14.41	9.16	9.22
				3439350	14.41	9.16	9.22
				3210285	13.42	9.16	9.22
				3281224	13.42	9.16	9.22
				3208089	13.31	8.9	8.99
		18:1	4	3208089	13.31	6.9	7.08
				3210285	13.42	6.85	7.03
				3281224	13.42	6.85	7.03
				3389146	14.41	6.57	6.76
				3439350	14.41	6.57	6.76
Thecc1EG019858 (TcSAD1) Thecc1EG019859 (TcSAD2) Thecc1EG019861 (TcSAD3)	26062764, 26306088	20:0	9	26233319	29.83	18.82	17.31
	26062764, 26306088	16:0	4	26092980	46.78	7.24	7.41
	26062764, 26306088	16:0	4	26144005	46.78	7.24	7.41
	26062764, 26306088	16:0	4	26157182	46.78	7.24	7.41
	26062764, 26306088	16:0	4	26291889	46.78	7.24	7.41
	26062764, 26306088	16:0	4	26179867	47	7.17	7.34
	26062764, 26306088	16:0	4	26191558	47	7.17	7.34
	26062764, 26306088	16:0	4	26196066	47	7.17	7.34
	26062764, 26306088	16:0	4	26205706	47.22	7.14	7.31
	26062764, 26306088	16:0	4	26216911	47.22	7.14	7.31
	26062764, 26306088	16:0	4	26081104	46.89	7.13	7.31
	26062764, 26306088	16:0	4	26090639	46.89	7.13	7.31
	26062764, 26306088	16:0	4	26143830	46.89	7.13	7.31
	26062764, 26306088	16:0	4	26088376	46.67	7.13	7.31
	26062764, 26306088	16:0	4	26139989	46.67	7.13	7.31
	26062764, 26306088	16:0	4	26216980	47.98	6.54	6.73
	26062764, 26306088	16:0	4	26248268	47.98	6.54	6.73
	26062764, 26306088	16:0	4	26254611	47.98	6.54	6.73
	26062764, 26306088	16:0	4	26263824	47.98	6.54	6.73
	26062764, 26306088	18:1	4	26205706	47.22	5.69	5.89
	26062764, 26306088	18:1	4	26216911	47.22	5.69	5.89
	26062764, 26306088	18:1	4	26179867	47	5.63	5.83
	26062764, 26306088	18:1	4	26191558	47	5.63	5.83
	26062764, 26306088	18:1	4	26196066	47	5.63	5.83
	26062764, 26306088	18:1	4	26092980	46.78	5.62	5.81
	26062764, 26306088	18:1	4	26144005	46.78	5.62	5.81
	26062764, 26306088	18:1	4	26157182	46.78	5.62	5.81
	26062764, 26306088	18:1	4	26291889	46.78	5.62	5.81
	26062764, 26306088	18:1	4	26081104	46.89	5.59	5.78
	26062764, 26306088	18:1	4	26090639	46.89	5.59	5.78
	26062764, 26306088	18:1	4	26143830	46.89	5.59	5.78
	26062764, 26306088	18:1	4	26088376	46.67	5.59	5.78
	26062764, 26306088	18:1	4	26139989	46.67	5.59	5.78
	26062764, 26306088	18:1	4	26216980	47.98	5.36	5.55
	26062764, 26306088	18:1	4	26248268	47.98	5.36	5.55
	26062764, 26306088	18:1	4	26254611	47.98	5.36	5.55
	26062764, 26306088	18:1	4	26263824	47.98	5.36	5.55
	26062764, 26306088	18:2	4	26216980	47.98	4.54	4.71
	26062764, 26306088	18:2	4	26248268	47.98	4.54	4.71
	26062764, 26306088	18:2	4	26254611	47.98	4.54	4.71
	26062764, 26306088	18:2	4	26263824	47.98	4.54	4.71
	26062764, 26306088	18:2	4	26205706	47.22	4.52	4.69
	26062764, 26306088	18:2	4	26216911	47.22	4.52	4.69
	26062764, 26306088	18:2	4	26179867	47	4.34	4.49
	26062764, 26306088	18:2	4	26191558	47	4.34	4.49
	26062764, 26306088	18:2	4	26196066	47	4.34	4.49
	26062764, 26306088	18:2	4	26081104	46.89	4.31	4.47
	26062764, 26306088	18:2	4	26090639	46.89	4.31	4.47
	26062764, 26306088	18:2	4	26143830	46.89	4.31	4.47
	26062764, 26306088	18:2	4	26088376	46.67	4.31	4.47
	26062764, 26306088	18:2	4	26139989	46.67	4.31	4.47
	26062764, 26306088	18:2	4	26092980	46.78	4.24	4.39
	26062764, 26306088	18:2	4	26144005	46.78	4.24	4.39
	26062764, 26306088	18:2	4	26157182	46.78	4.24	4.39
	26062764, 26306088	18:2	4	26291889	46.78	4.24	4.39
